# Supplementary material
Source: Springer Nature journal article supplement (https://www.springermedizin.de/resource/supplementary/12889_2011_3560_MOESM1_ESM.pdf/9489202)
Supplement: MOESM1 [file 9489202]

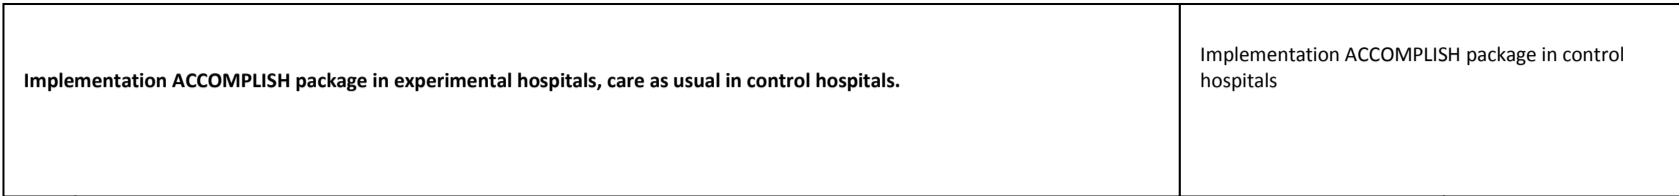

Data collection:  
Compliance  
Prevalence HAI  
Baseline questionnaire

Data collection:  
Compliance  
Prevalence HAI  
Process indicators

Data collection:  
Compliance  
Prevalence HAI  
Process indicators

Data collection:  
Compliance  
Prevalence HAI  
Process indicators

T<sub>1</sub>=0

T<sub>2</sub>=6 months

T<sub>3</sub>=12 months

T<sub>4</sub>=18 months
